# Supplementary material
Source: publisher site journal article supplement (https://www.dovepress.com/get_supplementary_file.php?f=290793.docx)
Supplement: Supplementary file 1 [file get_supplementary_file.php]

**Hummingbird Study Supplementary Appendix**

**s-Figure 1** Study design**.**

**
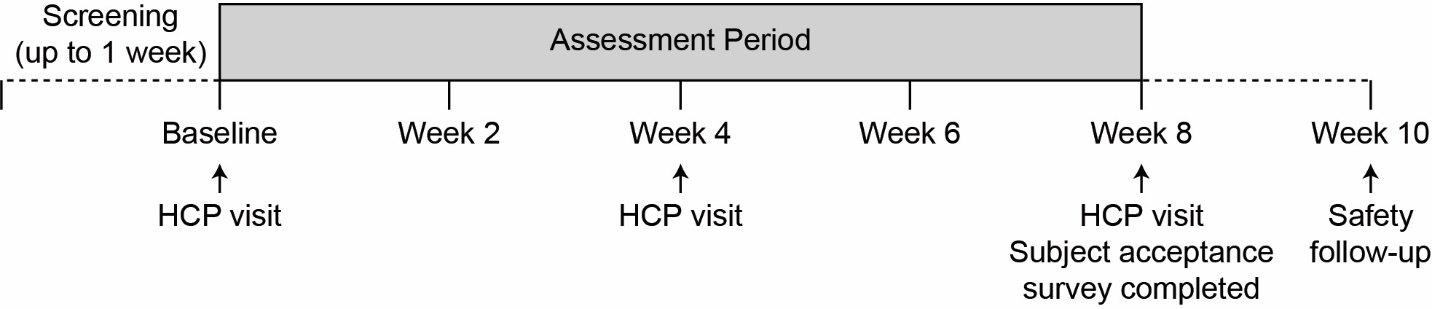
**

Abbreviation: HCP, healthcare provider.

**s-Table 1** Subject Usability and Satisfaction Scale survey at week 8
(intent-to-treat population).

| **Survey questions and response options** | **Enrolled subjects**  **(n = 43)a** |
| --- | --- |
| **Ease of applying patch on the body** |  |
| Very easy | 13 (30.2) |
| Easy | 12 (27.9) |
| Somewhat easy | 4 (9.3) |
| Neutral | 6 (14.0) |
| Somewhat difficult | 2 (4.7) |
| Difficult | 1 (2.3) |
| Extremely difficult | 1 (2.3) |
| **Ease of pairing patch with the mobile application** |  |
| Extremely easy | 5 (11.6) |
| Easy | 4 (9.3) |
| Somewhat easy | 8 (18.6) |
| Neutral | 6 (14.0) |
| Somewhat difficult | 7 (16.3) |
| Difficult | 6 (14.0) |
| Extremely difficult | 3 (7.0) |
| **Ease of using the mobile application** |  |
| Extremely easy | 14 (32.6) |
| Easy | 6 (14.0) |
| Somewhat easy | 6 (14.0) |
| Neutral | 4 (9.3) |
| Somewhat difficult | 4 (9.3) |
| Difficult | 2 (4.7) |
| Extremely difficult | 3 (7.0) |
| **Ease of using the DMS**b |  |
| Extremely easy | 12 (27.9) |
| Easy | 11 (25.6) |
| Somewhat easy | 7 (16.3) |
| Neutral | 4 (9.3) |
| Somewhat difficult | 0 |
| Difficult | 4 (9.3) |
| Extremely difficult | 1 (2.3) |
| **Did not mind wearing the patch** |  |
| Strongly agree | 14 (32.6) |
| Agree | 7 (16.3) |
| Somewhat agree | 5 (11.6) |
| Neutral | 3 (7.0) |
| Somewhat disagree | 2 (4.7) |
| Disagree | 7 (16.3) |
| Strongly disagree | 1 (2.3) |
| **Needed assistance in changing and pairing patches** |  |
| No | 14 (32.6) |
| Yes | 25 (58.1) |
| **Ease of using the entire DMS**c |  |
| Extremely easy | 5 (11.6) |
| Easy | 6 (14.0) |
| Somewhat easy | 14 (32.6) |
| Neutral | 3 (7.0) |
| Somewhat difficult | 4 (9.3) |
| Difficult | 4 (9.3) |
| Extremely difficult | 3 (7.0) |
| **Found the DMS helpful in managing their condition** |  |
| Extremely helpful | 8 (18.6) |
| Helpful | 0 |
| Somewhat helpful | 14 (32.6) |
| Neutral | 7 (16.3) |
| Somewhat unhelpful | 4 (9.3) |
| Unhelpful | 3 (7.0) |
| Extremely unhelpful | 3 (7.0) |
| **Found the DMS helpful for sharing data** |  |
| Extremely helpful | 10 (23.3) |
| Helpful | 8 (18.6) |
| Somewhat helpful | 5 (11.6) |
| Neutral | 12 (28.0) |
| Somewhat unhelpful | 1 (2.3) |
| Unhelpful | 2 (4.7) |
| Extremely unhelpful | 1 (2.3) |
| **Found the DMS helpful in improving discussions** |  |
| Extremely helpful | 3 (7.0 |
| Helpful | 5 (11.6) |
| Somewhat helpful | 5 (11.6) |
| Neutral | 19 (44.2) |
| Somewhat unhelpful | 0 |
| Unhelpful | 4 (9.3) |
| Extremely unhelpful | 2 (4.7) |
| **Satisfaction with the DMS** |  |
| Extremely satisfied | 7 (16.3) |
| Satisfied | 12 (28.0) |
| Somewhat satisfied | 4 (9.3) |
| Neutral | 4 (9.3) |
| Somewhat unsatisfied | 2 (4.7) |
| Unsatisfied | 9 (20.9) |
| Extremely unsatisfied | 1 (2.3) |
| **Willingness to use the DMS in the future** |  |
| Extremely likely | 8 (18.6) |
| Likely | 9 (20.9) |
| Somewhat likely | 6 (14.0) |
| Neutral | 2 (4.7) |
| Somewhat unlikely | 5 (11.6) |
| Unlikely | 5 (11.6) |
| Extremely unlikely | 4 (9.3) |

Data are presented as n (%).

a4 Subjects did not respond to the survey.

bAs asked in the “usability” section of the survey.

cAs asked in the “satisfaction” section of the survey.

Abbreviation: DMS, digital medicine system.
